# Supplementary material
Source: PubMed Central journal article supplement (PMC3023575)
Supplement: tran0103_0144SD1.pdf [file tran0103_0144SD1.pdf]

## Supplementary material

### Long-range RT-PCR of *Zbed6* and *Zc3h11* transcripts in mouse C2C12 cells

#### Materials and Methods

**Long-range RT-PCR.** First strand cDNA synthesis was performed with a long range reverse-transcriptase RevertAid Premium kit (Fermentas, Lithuania), according to manufacturer's instructions, using 5 µg total RNA with a gene specific primer (ZC1as, 5'-CTCTTTCGTTAATGGCAAATGGTTC) starting 60 nt upstream of the poly-adenylation site. PCR were performed using the KAPA HiFi HS polymerase (Kapa Biosystems, South Africa) and the following cycles: 95°C for 3 min; 98°C for 20 s, 56°C for 15 s, and 72°C for 8 min (4 cycles); 98°C for 20 s and 72°C for 8 min (36 cycles); 72°C for 3 min. Initial PCR was performed with a sense primer (ZCx2s with *SalI* site underlined, 5'-GATACGTCGACCGCAGCTAAGAAAAGAGAAAGACGTG) located close to the presumed transcription start, as judged by the UCSC Genome Browser (<http://genome.cse.ucsc.edu/>), and an anti-sense primer (ZCx2as with *NotI* site underlined, 5'-CATGCGGCCGCGTTGAACACAAATCATTGACTAATACAG) located 35 nt upstream of ZC1as. PCR with oligos ZCx2s-ZCx2as gave a very robust band at ~4.5 kb that was shown by direct sequencing to be the *Zc3h11a* transcript. Smearish DNA of higher molecular weight were seen on the gel, but an attempt to clone these fragments was unsuccessful. We postulated that a potentially much larger *Zbed6* transcript would be underrepresented after amplification due to competition with the smaller *Zc3h11a* product. We therefore performed PCR to obtain the 5'- and 3'-part of the *Zbed6* transcript in separate reactions, so that the reactions would not be affected by *Zc3h11a*-amplicons. The 5'-part of the *Zbed6* transcript was obtained with ZCx2s and the anti-sense primer KFxx1as (*NotI* site underlined; 5'-CATGCGGCCGCTCAAAGCTTCCATTGCTTCCAG), situated in the coding part of *Zbed6*, and the 3'-part was obtained with sense primer KFxx1s (*SalI* site underlined; 5'-GATACGTCGACCAAGAATTCCAAAATGATCACCAG, situated in the coding part of *Zbed6*, and ZCx2as. The PCR products were gel purified, cloned and sequenced. The sequence gap between products ZCx2s-KFxx1as and KFxx1s-ZCx2as, were filled with *Zbed6* sequence from Markljung et al.<sup>1</sup>; a sequence that originated from the same C2C12 cell line.

1. Markljung E, Jiang L, Jaffe JD, Mikkelsen TS, Wallerman O, Larhammar M, et al. ZBED6, a novel transcription factor derived from a domesticated DNA transposon regulates IGF2 expression and muscle growth. PloS Biol 2009; 7:e1000256.
